# Supplementary material
Source: Springer Nature journal article supplement (https://www.springermedizin.de/resource/supplementary/12985_2008_420_MOESM1_ESM.pdf/9608042)
Supplement: MOESM1 [file 9608042]

**Results of avian influenza surveillance in Alaska between May 2006 and March 2007.<sup>1</sup>**

The total number of samples collected, the number tested by matrix rRT-PCR and virus isolation in embryonated eggs, and the number of samples positive for avian influenza by both methods is presented for each of 126 species. The rRT-PCR results were used in the statistical analyses and summaries in the text.

| Family/Tribe             | Common Name                      | Scientific Name          | Number<br>Sampled | Number<br>RT-PCR<br>Positive | Number<br>for Virus<br>Isolation | Number<br>Virus<br>Isolation<br>Positive | RT-PCR<br>Positive<br>(%) | Virus<br>Isolation<br>Positive<br>(%) |
|--------------------------|----------------------------------|--------------------------|-------------------|------------------------------|----------------------------------|------------------------------------------|---------------------------|---------------------------------------|
| <i>Anatidae/Anserini</i> | Geese                            |                          | 5,194             | 87                           | 4,364                            | 32                                       | 1.67                      | 0.73                                  |
|                          | Greater white-fronted goose      | <i>Anser albifrons</i>   | 1,081             | 40                           | 847                              | 12                                       | 3.70                      | 1.42                                  |
|                          | <b>Emperor goose<sup>2</sup></b> | <i>Chen canagica</i>     | 685               | 11                           | 669                              | 8                                        | 1.61                      | 1.20                                  |
|                          | <b>Lesser snow goose</b>         | <i>C. caerulescens</i>   | 720               | 17                           | 646                              | 4                                        | 2.36                      | 0.62                                  |
|                          | <b>Black brant</b>               | <i>Branta bernicla</i>   | 2,075             | 8                            | 1,596                            | 3                                        | 0.38                      | 0.19                                  |
|                          | Cackling goose                   | <i>B. hutchinsii</i>     | 373               | 2                            | 357                              | 1                                        | 0.53                      | 0.28                                  |
|                          | Canada goose                     | <i>B. canadensis</i>     | 260               | 9                            | 249                              | 4                                        | 3.46                      | 1.61                                  |
| <i>Anatidae/Cygnini</i>  | Swans                            |                          | 593               | 7                            | 537                              | 7                                        | 1.18                      | 1.30                                  |
|                          | Trumpeter swan                   | <i>Cygnus buccinator</i> | 10                | 0                            | 4                                | 0                                        | 0.00                      | 0.00                                  |
|                          | <b>Tundra swan</b>               | <i>C. columbianus</i>    | 583               | 7                            | 533                              | 7                                        | 1.20                      | 1.31                                  |

|                          |                         |                            |       |     |       |     |      |       |
|--------------------------|-------------------------|----------------------------|-------|-----|-------|-----|------|-------|
| <i>Anatidae/Anatini</i>  | Surface-feeding Ducks   |                            | 2,342 | 164 | 1,309 | 107 | 6.99 | 8.17  |
|                          | Gadwall                 | <i>Anas strepera</i>       | 16    | 0   | 0     | 0   | 0.00 | -     |
|                          | Eurasian wigeon         | <i>A. penelope</i>         | 1     | 0   | 1     | 0   | 0.00 | 0.00  |
|                          | American wigeon         | <i>A. americana</i>        | 64    | 0   | 26    | 0   | 0.00 | 0     |
|                          | Mallard                 | <i>A. platyrhynchos</i>    | 273   | 25  | 157   | 25  | 9.16 | 15.92 |
|                          | Blue-winged teal        | <i>A. discors</i>          | 1     | 0   | 0     | 0   | 0.00 | -     |
|                          | Northern shoveler       | <i>A. clypeata</i>         | 22    | 1   | 19    | 1   | 4.55 | 5.26  |
|                          | <b>Northern pintail</b> | <i>A. acuta</i>            | 1,426 | 87  | 793   | 57  | 6.10 | 7.19  |
|                          | Green-winged teal       | <i>A. crecca</i>           | 539   | 51  | 313   | 24  | 9.43 | 7.67  |
| <i>Anatidae/Aythiini</i> | Bay Ducks               |                            | 29    | 0   | 24    | 0   | 0.00 | 0.00  |
|                          | Canvasback              | <i>Aythya valisineria</i>  | 8     | 0   | 4     | 0   | 0.00 | 0.00  |
|                          | Redhead                 | <i>A. americana</i>        | 1     | 0   | 0     | 0   | 0.00 | -     |
|                          | Greater scaup           | <i>A. marila</i>           | 1     | 0   | 1     | 0   | 0.00 | 0.00  |
|                          | Lesser scaup            | <i>A. affinis</i>          | 19    | 0   | 19    | 0   | 0.00 | 0.00  |
| <i>Anatidae/Mergini</i>  | Sea Ducks               |                            | 2,332 | 16  | 1,716 | 18  | 0.69 | 1.05  |
|                          | <b>Steller's eider</b>  | <i>Polysticta stelleri</i> | 737   | 6   | 300   | 3   | 0.81 | 1.00  |
|                          | <b>Spectacled eider</b> | <i>Somateria fischeri</i>  | 348   | 2   | 293   | 1   | 0.57 | 0.34  |
|                          | <b>King eider</b>       | <i>S. spectabilis</i>      | 680   | 6   | 640   | 9   | 0.88 | 1.41  |
|                          | <b>Common eider</b>     | <i>S. mollissima</i>       | 395   | 1   | 383   | 4   | 0.25 | 1.04  |

|                          |                         |                                  |    |   |    |   |      |      |
|--------------------------|-------------------------|----------------------------------|----|---|----|---|------|------|
|                          | Harlequin duck          | <i>Histrionicus histrionicus</i> | 65 | 0 | 0  | 0 | 0.00 | -    |
|                          | Surf scoter             | <i>Melanitta perspicillata</i>   | 2  | 0 | 2  | 0 | 0.00 | 0.00 |
|                          | White-winged scoter     | <i>M. fusca</i>                  | 41 | 0 | 41 | 0 | 0.00 | 0.00 |
|                          | Black scoter            | <i>M. nigra</i>                  | 10 | 0 | 10 | 0 | 0.00 | 0.00 |
|                          | <b>Long-tailed duck</b> | <i>Clangula hyemalis</i>         | 52 | 1 | 46 | 1 | 1.92 | 2.17 |
|                          | Bufflehead              | <i>Bucephala albeola</i>         | 1  | 0 | 1  | 0 | 0.00 | 0.00 |
|                          | Common merganser        | <i>Mergus merganser</i>          | 1  | 0 | 1  | 0 | 0.00 | 0.00 |
| <i>Gaviidae</i>          | Loons                   |                                  | 9  | 0 | 5  | 0 | 0.00 | 0.00 |
|                          | Red-throated loon       | <i>Gavia stellata</i>            | 3  | 0 | 0  | 0 | 0.00 | -    |
|                          | Arctic loon             | <i>G. arctica</i>                | 1  | 0 | 1  | 0 | 0.00 | 0.00 |
|                          | Pacific loon            | <i>G. pacifica</i>               | 2  | 0 | 2  | 0 | 0.00 | 0.00 |
|                          | Common loon             | <i>G. immer</i>                  | 1  | 0 | 1  | 0 | 0.00 | 0.00 |
|                          | Yellow-billed loon      | <i>G. adamsii</i>                | 2  | 0 | 1  | 0 | 0.00 | 0.00 |
| <i>Podicipedidae</i>     | Grebes                  |                                  | 1  | 0 | 1  | 0 | 0.00 | 0.00 |
|                          | Red-necked grebe        | <i>Podiceps grisegena</i>        | 1  | 0 | 1  | 0 | 0.00 | 0.00 |
| <i>Procellariidae</i>    | Shearwaters, Petrels    |                                  | 1  | 0 | 1  | 0 | 0.00 | 0.00 |
|                          | Northern fulmar         | <i>Fulmarus glacialis</i>        | 1  | 0 | 1  | 0 | 0.00 | 0.00 |
| <i>Phalacrocoracidae</i> | Cormorants              |                                  | 5  | 0 | 5  | 0 | 0.00 | 0.00 |
|                          | Pelagic cormorant       | <i>Phalacrocorax pelagicus</i>   | 3  | 0 | 3  | 0 | 0.00 | 0.00 |

|                     |                              |                                |       |   |       |   |      |      |
|---------------------|------------------------------|--------------------------------|-------|---|-------|---|------|------|
|                     | Red-faced cormorant          | <i>P. urile</i>                | 2     | 0 | 2     | 0 | 0.00 | 0.00 |
| <i>Gruidae</i>      | Cranes                       |                                | 161   | 0 | 131   | 0 | 0.00 | 0.00 |
|                     | <b>Sandhill crane</b>        | <i>Grus canadensis</i>         | 161   | 0 | 131   | 0 | 0.00 | 0.00 |
| <i>Charadriidae</i> | Lapwings, Plovers            |                                | 140   | 0 | 122   | 0 | 0.00 | 0.00 |
|                     | Black-bellied plover         | <i>Pluvialis squatarola</i>    | 73    | 0 | 63    | 0 | 0.00 | 0.00 |
|                     | American golden plover       | <i>P. dominica</i>             | 15    | 0 | 14    | 0 | 0.00 | 0.00 |
|                     | <b>Pacific golden plover</b> | <i>P. fulva</i>                | 42    | 0 | 35    | 0 | 0.00 | 0.00 |
|                     | Golden plover spp.           | <i>P. spp.</i>                 | 6     | 0 | 6     | 0 | 0.00 | 0.00 |
|                     | Semipalmated plover          | <i>Charadrius semipalmatus</i> | 4     | 0 | 4     | 0 | 0.00 | 0.00 |
| <i>Scolopacidae</i> | Sandpipers, Phalaropes       |                                | 3,040 | 5 | 2,402 | 1 | 0.16 | 0.04 |
|                     | Greater yellowlegs           | <i>T. melanoleuca</i>          | 1     | 0 | 1     | 0 | 0.00 | 0.00 |
|                     | Whimbrel                     | <i>Neumenius phaeopus</i>      | 1     | 0 | 1     | 0 | 0.00 | 0.00 |
|                     | Bristle-thighed curlew       | <i>N. tahitiensis</i>          | 9     | 0 | 9     | 0 | 0.00 | 0.00 |
|                     | <b>Bar-tailed godwit</b>     | <i>Limosa lapponica</i>        | 210   | 3 | 167   | 0 | 1.43 | 0.00 |
|                     | <b>Ruddy turnstone</b>       | <i>Arenaria interpres</i>      | 30    | 0 | 27    | 0 | 0.00 | 0.00 |
|                     | Black turnstone              | <i>A. melanocephala</i>        | 2     | 0 | 2     | 0 | 0.00 | 0.00 |
|                     | <b>Red knot</b>              | <i>Calidris canutus</i>        | 79    | 0 | 71    | 0 | 0.00 | 0.00 |
|                     | Semipalmated sandpiper       | <i>C. pusilla</i>              | 212   | 0 | 108   | 0 | 0.00 | 0.00 |
|                     | Western sandpiper            | <i>C. mauri</i>                | 128   | 0 | 52    | 0 | 0.00 | 0.00 |

|                                |                                |     |   |     |   |      |      |
|--------------------------------|--------------------------------|-----|---|-----|---|------|------|
| Baird's sandpiper              | <i>C. bairdii</i>              | 1   | 0 | 1   | 0 | 0.00 | 0.00 |
| <b>Pectoral sandpiper</b>      | <i>C. melanotos</i>            | 580 | 0 | 549 | 1 | 0.00 | 0.18 |
| <b>Sharp-tailed sandpiper</b>  | <i>C. acuminata</i>            | 225 | 0 | 192 | 0 | 0.00 | 0.00 |
| <b>Rock sandpiper</b>          | <i>C. ptilocnemis</i>          | 173 | 0 | 156 | 0 | 0.00 | 0.00 |
| <b>Dunlin</b>                  | <i>C. alpina</i>               | 897 | 2 | 682 | 0 | 0.22 | 0.00 |
| Stilt sandpiper                | <i>C. himantopus</i>           | 3   | 0 | 3   | 0 | 0.00 | 0.00 |
| <b>Buff-breasted sandpiper</b> | <i>Tryngites subruficollis</i> | 92  | 0 | 81  | 0 | 0.00 | 0.00 |
| Ruff                           | <i>Philomachus pugnax</i>      | 6   | 0 | 6   | 0 | 0.00 | 0.00 |
| <b>Long-billed dowitcher</b>   | <i>Limnodromus scolopaceus</i> | 165 | 0 | 157 | 0 | 0.00 | 0.00 |
| Wilson's snipe                 | <i>Gallinago delicata</i>      | 9   | 0 | 5   | 0 | 0.00 | 0.00 |
| Red-necked phalarope           | <i>Phalaropus lobatus</i>      | 38  | 0 | 18  | 0 | 0.00 | 0.00 |
| Red phalarope                  | <i>P. fulicarius</i>           | 179 | 0 | 114 | 0 | 0.00 | 0.00 |
| <i>Laridae</i>                 |                                |     |   |     |   |      |      |
| Gulls, Terns                   |                                | 453 | 6 | 358 | 7 | 1.32 | 1.96 |
| Mew gull                       | <i>Larus canus</i>             | 5   | 0 | 5   | 0 | 0.00 | 0.00 |
| Herring gull                   | <i>L. argentatus</i>           | 4   | 0 | 3   | 0 | 0.00 | 0.00 |
| <b>Glaucous gull</b>           | <i>L. hyperboreus</i>          | 138 | 5 | 45  | 4 | 3.60 | 8.89 |
| Sabine's gull                  | <i>Xema sabini</i>             | 1   | 0 | 0   | 0 | 0.00 | -    |
| Black-legged kittiwake         | <i>Risa tridactyla</i>         | 2   | 0 | 2   | 0 | 0.00 | 0.00 |
| <b>Aleutian tern</b>           | <i>Onychoprion aleuticus</i>   | 302 | 1 | 302 | 3 | 0.33 | 0.99 |

|                       |                       |                               |     |   |     |    |      |      |
|-----------------------|-----------------------|-------------------------------|-----|---|-----|----|------|------|
|                       | Arctic tern           | <i>Sterna paradisaea</i>      | 1   | 0 | 1   | 0  | 0.00 | 0.00 |
| <i>Stercorariidae</i> | Jaegers               |                               | 6   | 0 | 5   | 0  | 0.00 | 0.00 |
|                       | Pomarine jaeger       | <i>Stercorarius pomarinus</i> | 4   | 0 | 3   | 0  | 0.00 | 0.00 |
|                       | Long-tailed jaeger    | <i>S. longicaudus</i>         | 2   | 0 | 2   | 0  | 0.00 | 0.00 |
| <i>Alcidae</i>        | Auks, Murres, Puffins |                               | 562 | 8 | 562 | 16 | 1.42 | 2.85 |
|                       | Common murre          | <i>Uria aalge</i>             | 76  | 1 | 76  | 2  | 1.32 | 2.63 |
|                       | Thick-billed murre    | <i>U. lomvia</i>              | 235 | 7 | 235 | 10 | 2.98 | 4.26 |
|                       | Parakeet auklet       | <i>Aethia psittacula</i>      | 8   | 0 | 8   | 0  | 0.00 | 0.00 |
|                       | Least auklet          | <i>A. pusilla</i>             | 30  | 0 | 30  | 0  | 0.00 | 0.00 |
|                       | Crested auklet        | <i>A. cristatella</i>         | 207 | 0 | 207 | 4  | 0.00 | 1.93 |
|                       | Horned puffin         | <i>Fratercula corniculata</i> | 2   | 0 | 2   | 0  | 0.00 | 0.00 |
|                       | Tufted puffin         | <i>F. cirrhata</i>            | 4   | 0 | 4   | 0  | 0.00 | 0.00 |
| <i>Strigidae</i>      | Owls                  |                               | 1   | 0 | 0   | 0  | 0.00 | -    |
|                       | Short-eared owl       | <i>Asio flammeus</i>          | 1   | 0 | 0   | 0  | 0.00 | -    |
| <i>Picidae</i>        | Woodpeckers           |                               | 1   | 0 | 0   | 0  | 0.00 | -    |
|                       | Northern flicker      | <i>Colaptes auratus</i>       | 1   | 0 | 0   | 0  | 0.00 | -    |
| <i>Tyrannidae</i>     | Tyrant Flycatchers    |                               | 5   | 0 | 0   | 0  | 0.00 | -    |
|                       | Alder flycatcher      | <i>Empidonax alnorum</i>      | 5   | 0 | 0   | 0  | 0.00 | -    |
| <i>Laniidae</i>       | Shrikes               |                               | 2   | 0 | 1   | 0  | 0.00 | 0.00 |

|                     |                        |                                 |     |   |     |   |      |      |
|---------------------|------------------------|---------------------------------|-----|---|-----|---|------|------|
|                     | Northern shrike        | <i>Lanius excubitor</i>         | 2   | 0 | 1   | 0 | 0.00 | 0.00 |
| <i>Corvidae</i>     | Crows, Jays            |                                 | 5   | 0 | 3   | 0 | 0.00 | 0.00 |
|                     | Gray jay               | <i>Perisoreus canadensis</i>    | 2   | 0 | 0   | 0 | 0.00 | -    |
|                     | Common raven           | <i>Corvus corax</i>             | 3   | 0 | 3   | 0 | 0.00 | 0.00 |
| <i>Alaudidae</i>    | Larks                  |                                 | 1   | 0 | 1   | 0 | 0.00 | 0.00 |
|                     | Horned lark            | <i>Eremophila alpestris</i>     | 1   | 0 | 1   | 0 | 0.00 | 0.00 |
| <i>Hirundinidae</i> | Swallows               |                                 | 2   | 0 | 0   | 0 | 0.00 | -    |
|                     | Tree swallow           | <i>Tachycineta bicolor</i>      | 1   | 0 | 0   | 0 | 0.00 | -    |
|                     | Cliff swallow          | <i>Petrochelidon pyrrhonota</i> | 1   | 0 | 0   | 0 | 0.00 | -    |
| <i>Paridae</i>      | Chickadees             |                                 | 1   | 0 | 0   | 0 | 0.00 | -    |
|                     | Black-capped chickadee | <i>Poecile atricapillus</i>     | 1   | 0 | 0   | 0 | 0.00 | -    |
| <i>Certhiidae</i>   | Creepers               |                                 | 1   | 0 | 0   | 0 | 0.00 | -    |
|                     | Brown creeper          | <i>Certhia americana</i>        | 1   | 0 | 0   | 0 | 0.00 | -    |
| <i>Regulidae</i>    | Kinglets               |                                 | 2   | 0 | 0   | 0 | 0.00 | -    |
|                     | Ruby-crowned kinglet   | <i>Regulus calendula</i>        | 2   | 0 | 0   | 0 | 0.00 | -    |
| <i>Sylviidae</i>    | Old World Warblers     |                                 | 769 | 0 | 409 | 0 | 0.00 | 0.00 |
|                     | <b>Arctic warbler</b>  | <i>Phylloscopus borealis</i>    | 769 | 0 | 409 | 0 | 0.00 | 0.00 |
| <i>Turdidae</i>     | Thrushes               |                                 | 302 | 0 | 137 | 0 | 0.00 | 0.00 |
|                     | Bluethroat             | <i>Luscinia svecica</i>         | 12  | 0 | 6   | 0 | 0.00 | 0.00 |

|                     |                               |                                 |     |   |     |   |      |      |
|---------------------|-------------------------------|---------------------------------|-----|---|-----|---|------|------|
|                     | Northern wheatear             | <i>Oenanthe oenanthe</i>        | 10  | 0 | 1   | 0 | 0.00 | 0.00 |
|                     | <b>Gray-cheeked thrush</b>    | <i>Catharus minimus</i>         | 229 | 0 | 124 | 0 | 0.00 | 0.00 |
|                     | Swainson's thrush             | <i>C. ustulatus</i>             | 20  | 0 | 0   | 0 | 0.00 | -    |
|                     | Hermit thrush                 | <i>C. guttatus</i>              | 10  | 0 | 1   | 0 | 0.00 | 0.00 |
|                     | American robin                | <i>Turdus migratorius</i>       | 11  | 0 | 5   | 0 | 0.00 | 0.00 |
|                     | Varied thrush                 | <i>Ixoreus naevius</i>          | 10  | 0 | 0   | 0 | 0.00 | -    |
| <i>Motacillidae</i> | Wagtails, Pipits              |                                 | 306 | 0 | 217 | 0 | 0.00 | 0.00 |
|                     | <b>Eastern yellow wagtail</b> | <i>Motacilla tschutschensis</i> | 304 | 0 | 216 | 0 | 0.00 | 0.00 |
|                     | American pipit                | <i>Anthus rubescens</i>         | 2   | 0 | 1   | 0 | 0.00 | 0.00 |
| <i>Parulidae</i>    | Wood warblers                 |                                 | 135 | 0 | 27  | 0 | 0.00 | 0.00 |
|                     | Orange-crowned warbler        | <i>Vermivora celata</i>         | 44  | 0 | 2   | 0 | 0.00 | 0.00 |
|                     | Yellow warbler                | <i>Dendroica petechia</i>       | 7   | 0 | 7   | 0 | 0.00 | 0.00 |
|                     | Yellow-rumped warbler         | <i>D. coronata</i>              | 11  | 0 | 0   | 0 | 0.00 | -    |
|                     | Bay-breasted warbler          | <i>D. castanea</i>              | 1   | 0 | 0   | 0 | 0.00 | -    |
|                     | Blackpoll warbler             | <i>D. striata</i>               | 3   | 0 | 1   | 0 | 0.00 | 0.00 |
|                     | Northern waterthrush          | <i>Seiurus noveboracensis</i>   | 27  | 0 | 13  | 0 | 0.00 | 0.00 |
|                     | Wilson's warbler              | <i>Wilsonia pusilla</i>         | 42  | 0 | 4   | 0 | 0.00 | 0.00 |
| <i>Emberizidae</i>  | Emberizids                    |                                 | 329 | 0 | 90  | 1 | 0.00 | 1.11 |
|                     | American tree sparrow         | <i>Spizella arborea</i>         | 96  | 0 | 29  | 0 | 0.00 | 0.00 |

|                     |                        |                                  |        |     |        |     |      |       |
|---------------------|------------------------|----------------------------------|--------|-----|--------|-----|------|-------|
|                     | Savannah sparrow       | <i>Passerculus sandwichensis</i> | 92     | 0   | 30     | 0   | 0.00 | 0.00  |
|                     | Fox sparrow            | <i>Passerella iliaca</i>         | 26     | 0   | 15     | 0   | 0.00 | 0.00  |
|                     | Lincoln's sparrow      | <i>Melospiza lincolnii</i>       | 20     | 0   | 0      | 0   | 0.00 | -     |
|                     | White-crowned sparrow  | <i>Zonotrichia leucophrys</i>    | 49     | 0   | 5      | 0   | 0.00 | 0.00  |
|                     | Golden-crowned sparrow | <i>Z. atricapilla</i>            | 20     | 0   | 3      | 0   | 0.00 | 0.00  |
|                     | Dark-eyed junco        | <i>Junco hyemalis</i>            | 16     | 0   | 0      | 0   | 0.00 | -     |
|                     | Lapland longspur       | <i>Calcarius lapponicus</i>      | 8      | 0   | 6      | 0   | 0.00 | 0.00  |
|                     | Snow bunting           | <i>Plectrophenax nivalis</i>     | 2      | 0   | 2      | 1   | 0.00 | 50.00 |
| <i>Fringillidae</i> | Finches                |                                  | 67     | 0   | 15     | 0   | 0.00 | 0.00  |
|                     | Brambling              | <i>Fringilla montifringilla</i>  | 1      | 0   | 1      | 0   | 0.00 | 0.00  |
|                     | Pine grosbeak          | <i>Pinicola enucleator</i>       | 3      | 0   | 0      | 0   | 0.00 | -     |
|                     | White-winged crossbill | <i>Loxia leucoptera</i>          | 1      | 0   | 0      | 0   | 0.00 | -     |
|                     | Common redpoll         | <i>Carduelis flammea</i>         | 52     | 0   | 9      | 0   | 0.00 | 0.00  |
|                     | Hoary redpoll          | <i>C. hornemanni</i>             | 10     | 0   | 5      | 0   | 0.00 | 0.00  |
| TOTALS              |                        |                                  | 16,797 | 293 | 12,442 | 189 | 1.74 | 1.52  |

<sup>1</sup>Additional details regarding age, sex, and geographic composition of samples can be found in USFWS/USGS: Sampling for highly pathogenic Asian H5N1 avian influenza in migratory birds in Alaska: results of 2006 field season. Progress Report, U. S. Fish and Wildlife Service (Region 7, Alaska) and U. S. Geological Survey, Alaska Science Center, Anchorage Alaska. [[http://Alaska.usgs.gov/science/biology/avian\\_influenza/pdfs/USFWS-USGS\\_2006\\_AK\\_HPAI\\_H5N1\\_Sampling\\_Accom\\_Rep.pdf](http://Alaska.usgs.gov/science/biology/avian_influenza/pdfs/USFWS-USGS_2006_AK_HPAI_H5N1_Sampling_Accom_Rep.pdf)].

<sup>2</sup>Common names of birds in bold font were priority species for sampling.
